# Supplementary material for: Effect of an evidence-based website on healthcare usage: an interrupted time-series study
Source: PubMed Central journal article supplement — BMJ Open. 2016 Nov 9;6(11):e013166. doi: 10.1136/bmjopen-2016-013166 (PMC5128895; doi:10.1136/bmjopen-2016-013166), 2016-11-09
Supplement: bmjopen-2016-013166supp_tables.pdf [file bmjopen-2016-013166supp_tables.pdf]

# Supplement

Supplement to: Spoelman WA, Bonten TN, de Waal MWM, et al. Effect of an evidence-based website on health care utilization: an interrupted time-series study

## Contents

eTable 1

eTable 2

eTable 3

eTable 4

eTable 5

eTable 6

## eTables

**eTable 1.** Characteristics of the study population over time.

|                    | Year        |             |             |             |             | Whole study period |
|--------------------|-------------|-------------|-------------|-------------|-------------|--------------------|
|                    | 2010        | 2011        | 2012        | 2013        | 2014        |                    |
| N, total           | 637 467     | 1 143 455   | 695 316     | 1 009 195   | 1 638 602   | 5 124 035          |
| Age<br>(mean, sd)  | 39.3 (22.7) | 39.4 (22.7) | 40.5 (22.9) | 40.5 (23.0) | 41.0 (23.0) | 40.2 (22.9)        |
| Gender<br>(% male) | 49.5        | 49.1        | 49.4        | 49.3        | 49.4        | 49.3               |

SD: standard deviation

**eTable 2.** Change in consultation rate before and after the launch of the website in march 2012, stratified for type of consultation.

| Consultation type | Constant <sup>a</sup> | Pre-intervention slope | Post-intervention slope | Slope change | P-value |
|-------------------|-----------------------|------------------------|-------------------------|--------------|---------|
| Short             | 185.095               | -0.142                 | -0.603                  | -0.461       | .097    |
| Telephone         | 62.357                | 0.726                  | -0.330                  | -1.056       | .001    |
| Long              | 24.234                | 0.267                  | 0.172                   | -0.095       | .152    |

Values are presented as consultations/1000 patients/month

<sup>a</sup>Consultation rate at t=0

**eTable 3.** Level change in consultation rate 1 and 2 years after the launch of the website

| Type of consultations | 1 year after website release |                       |         | 2 year after website release |                       |         |
|-----------------------|------------------------------|-----------------------|---------|------------------------------|-----------------------|---------|
|                       | Absolute slope change        | Relative slope change | P-value | Absolute slope change        | Relative slope change | P-value |
| All consultations     | -20.458                      | -6.3%                 | .02     | -39.901                      | -11.6%                | .003    |
| Top 10 topics         | -1.574                       | -4.6%                 | .14     | -3.607                       | -10.1%                | .02     |

Values are presented as consultations/1000 patients/month

**eTable 4.** Change in consultation rate before and after the launch of the website, including only high-grade ICPC recording (>95%) family physicians.

| Type of consultations | Constant <sup>a</sup> | Pre-intervention slope | Post-intervention slope | Slope change | P-Value |
|-----------------------|-----------------------|------------------------|-------------------------|--------------|---------|
| All consultations     | 269.790               | 0.553                  | -0.680                  | -1.234       | .03     |
| Top 10 topics         | 31.246                | 0.034                  | -0.117                  | -0.151       | .02     |
| Reference group       | 4.787                 | 0.002                  | -0.022                  | -0.024       | .05     |

Values are presented as consultations/1000 patients/month

<sup>a</sup> Consultation rate at t=0

**eTable 5.** Change in consultation rate before and after the launch of the website, including only family physicians recording throughout the entire study period.

| Type of consultations | Constant <sup>a</sup> | Pre-intervention slope | Post-intervention slope | Slope change | P-Value |
|-----------------------|-----------------------|------------------------|-------------------------|--------------|---------|
| All consultations     | 278.473               | 0.739                  | -1.253                  | -1.992       | <.001   |
| Top 10 topics         | 29.895                | 0.042                  | -0.104                  | -0.146       | .02     |
| Reference group       | 4.951                 | -0.007                 | -0.001                  | 0.006        | .66     |

Values are presented as consultations/1000 patients/month

<sup>a</sup> Consultation rate at t=0

**eTable 6.** Change in consultation rate before and after the launch of the website stratified for chronic care<sup>a</sup> and non-chronic care.

| Type of consultations | Constant <sup>b</sup> | Pre-intervention slope | Post-intervention slope | Slope change | P-Value |
|-----------------------|-----------------------|------------------------|-------------------------|--------------|---------|
| Chronic care*         | 31.959                | 0.136                  | -0.097                  | -0.233       | .005    |
| Non-chronic care      | 240.168               | 0.692                  | -0.697                  | -1.389       | <.001   |

Values are presented as consultations/1000 patients/month

<sup>a</sup>Chronic care was defined as the consultations typically performed by the nurse practitioner: Diabetes Mellitus (T90), COPD (R95), Asthma (R96) and cardiovascular disease/risk management (K49, K74, K75, K76, K85, K86, K87, K89, K90, K92 and K99)

<sup>b</sup>Consultation rate at t=0
